# Supplementary material for: A quasi-paired cohort strategy reveals the impaired detoxifying function of microbes in the gut of autistic children
Source: PubMed Central journal article supplement — Sci Adv. 2020 Oct 21;6(43):eaba3760. doi: 10.1126/sciadv.aba3760 (PMC7577716; doi:10.1126/sciadv.aba3760), 2020-10-21
Supplement: aba3760_SM.pdf [file aba3760_SM.pdf]

[advances.sciencemag.org/cgi/content/full/6/43/eaba3760/DC1](https://advances.sciencemag.org/cgi/content/full/6/43/eaba3760/DC1)

## Supplementary Materials for

### **A quasi-paired cohort strategy reveals the impaired detoxifying function of microbes in the gut of autistic children**

Mengxiang Zhang, Yanan Chu, Qingren Meng, Rui Ding, Xing Shi, Zuqun Wang, Yi He, Juan Zhang, Jing Liu, Jie Zhang, Jun Yu, Yu Kang\*, Juan Wang\*

\*Corresponding author. Email: [wjuan@hsc.pku.edu.cn](mailto:wjuan@hsc.pku.edu.cn) (J.W.); [kangy@big.ac.cn](mailto:kangy@big.ac.cn) (Y.K.)

Published 21 October 2020, *Sci. Adv.* **6**, eaba3760 (2020)  
DOI: 10.1126/sciadv.aba3760

#### **This PDF file includes:**

Figs. S1 to S5  
Tables S1 to S5

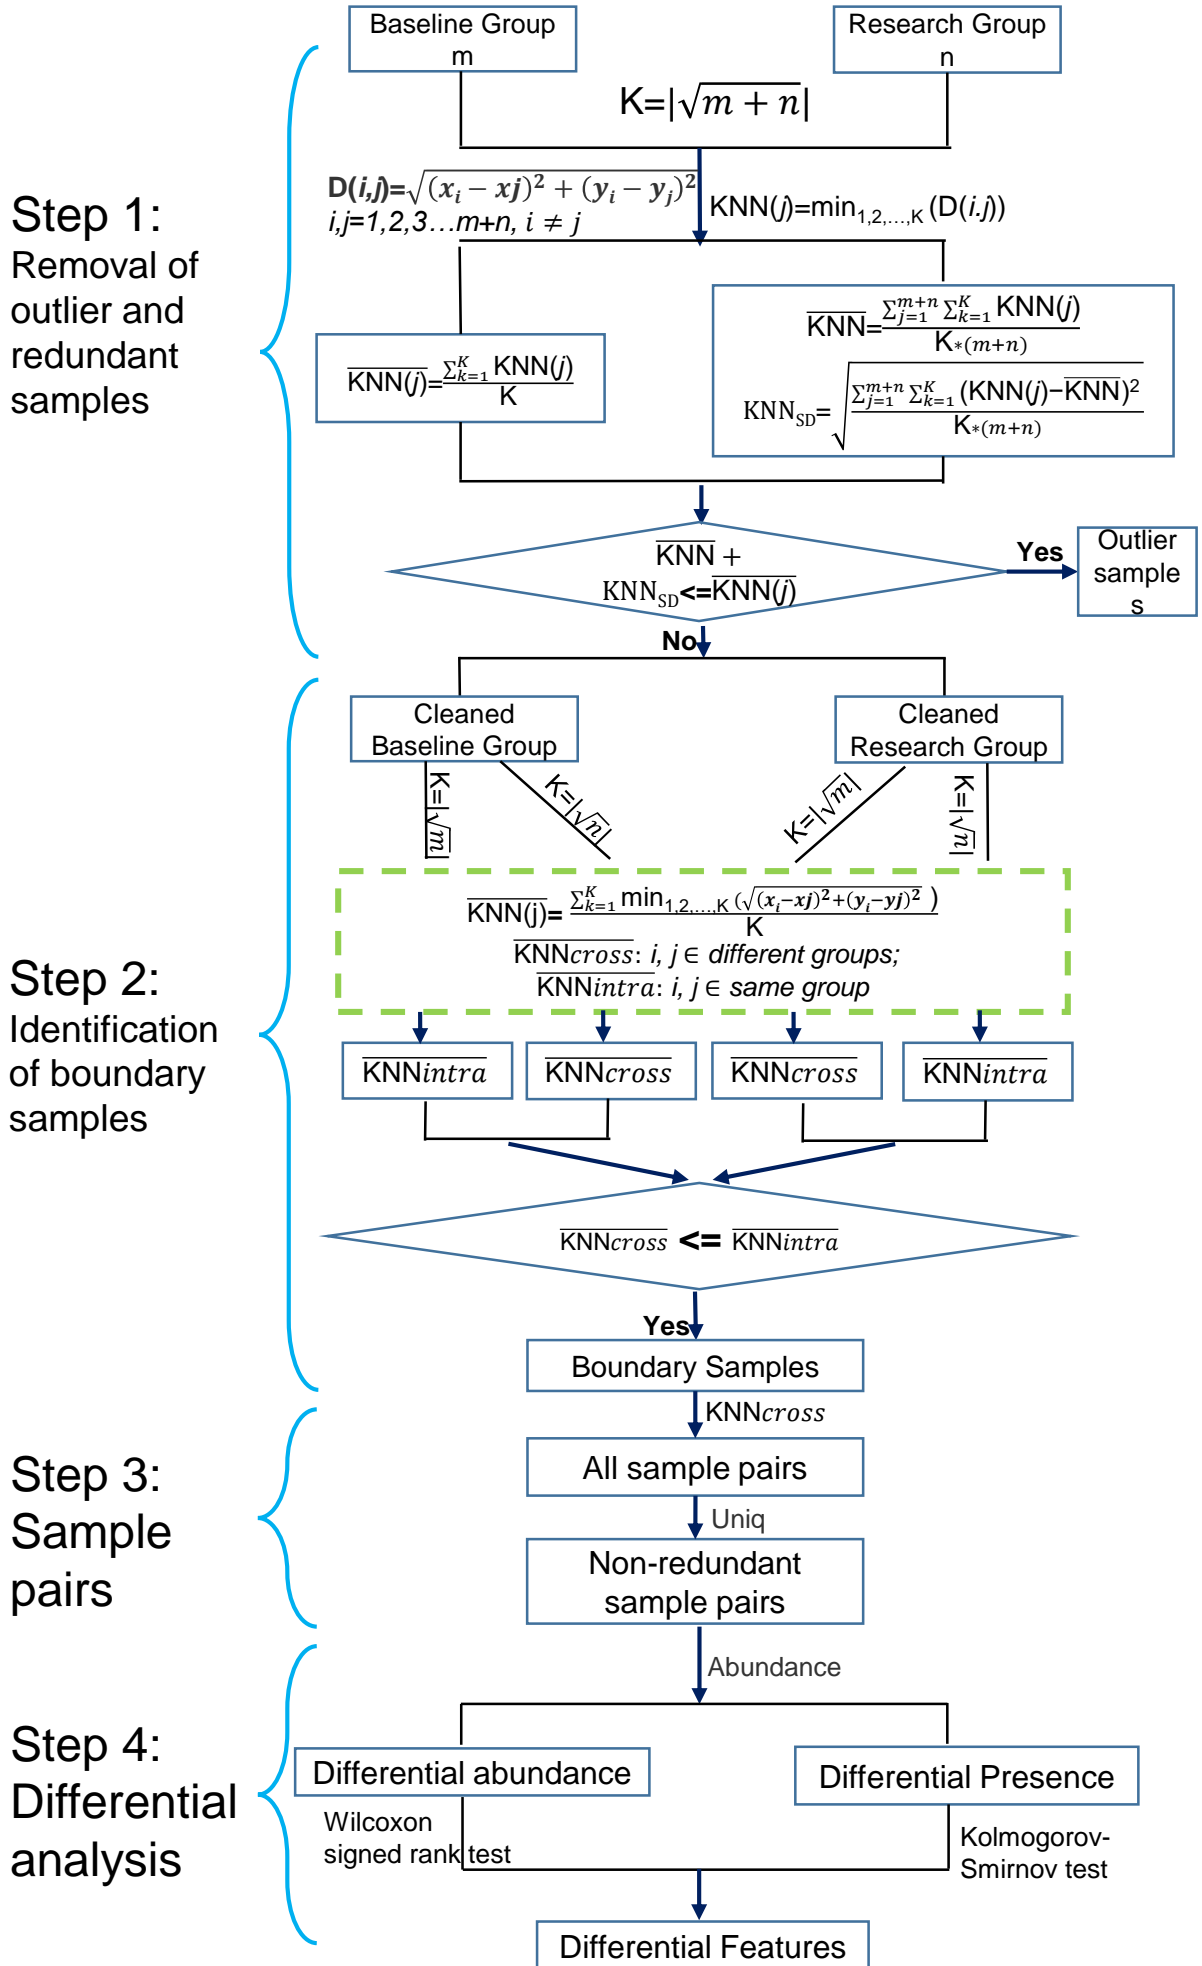

**Fig. S1. Flowchart of quasi-paired cohort analysis**

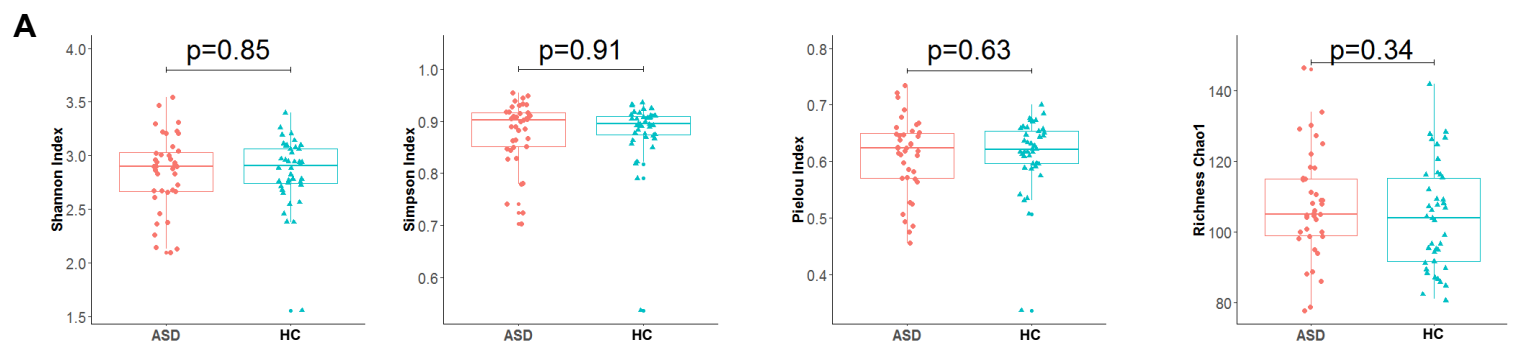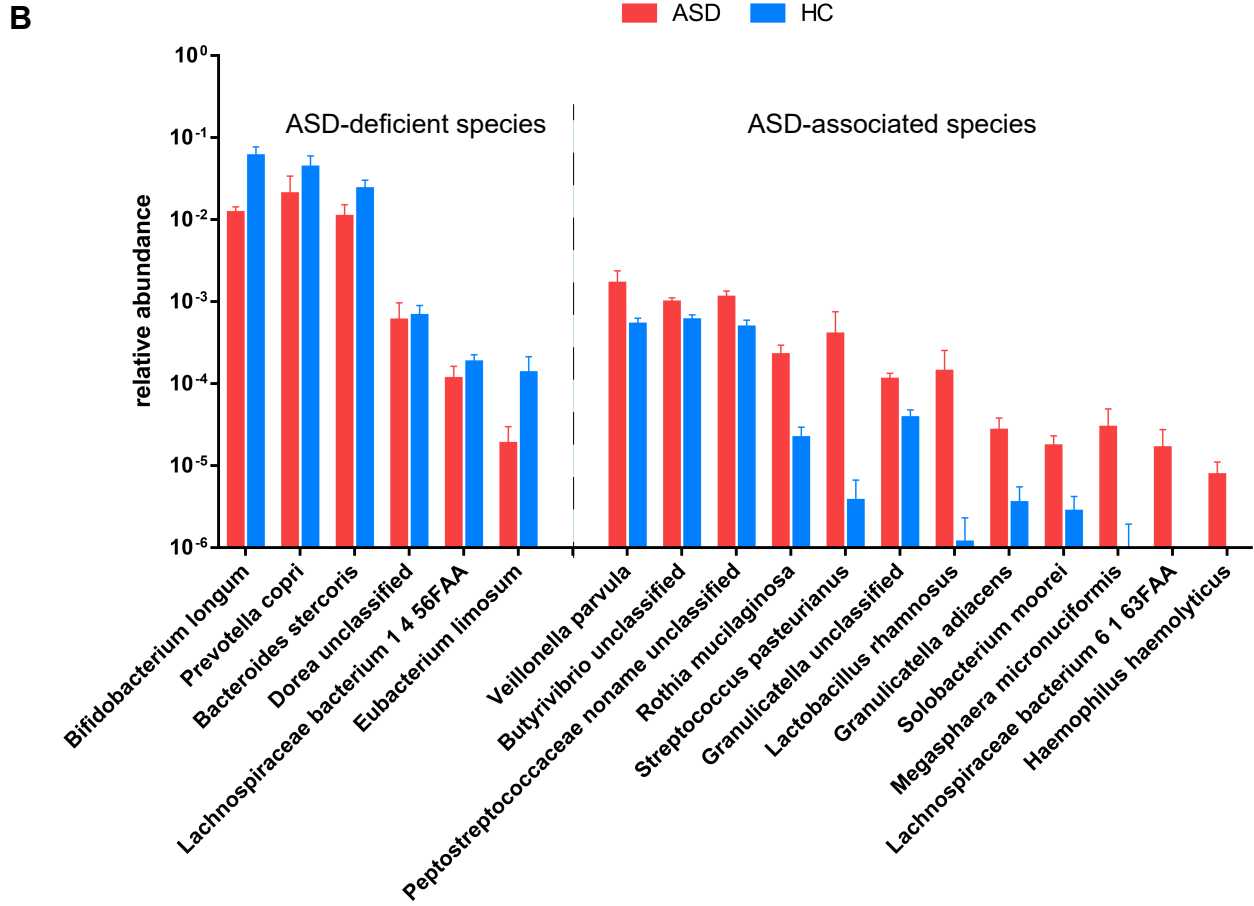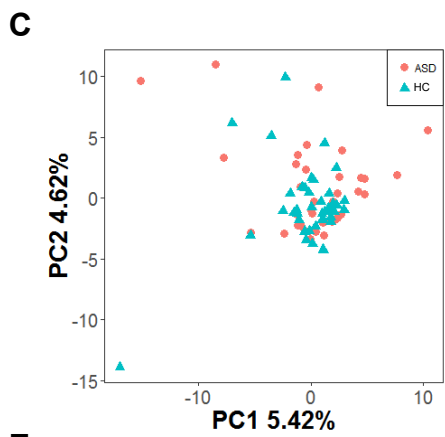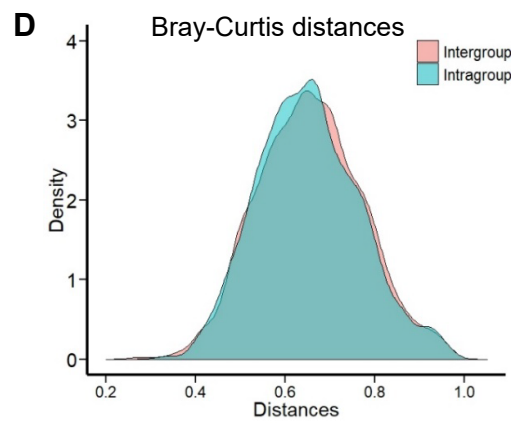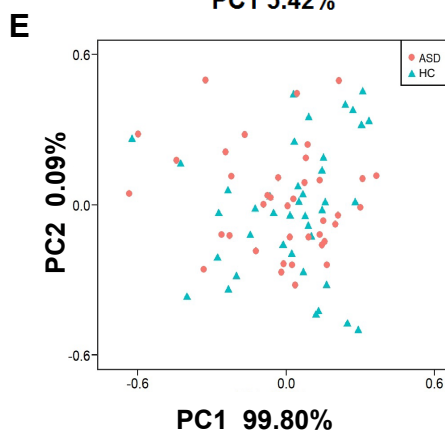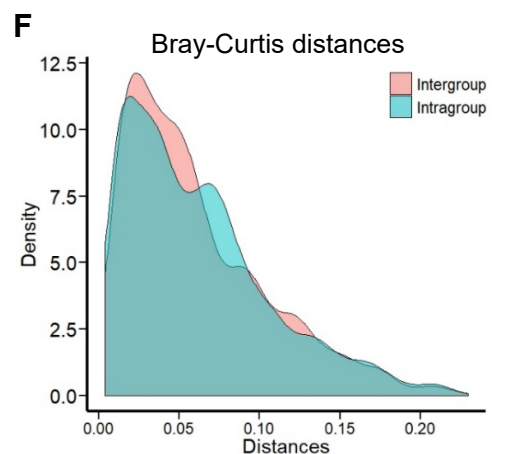

**Fig. S2. Inter-individual diversity in intestinal microbiomes.** **A.** Diversity and richness of the microbiome of ASD and HC, including the Shannon index, Simpson index, Pielou index and Chao1 richness. **B.** Differential species in HC and ASD samples. There are 6 deficient and 12 enriched species in ASD children (red) comparing with control subjects (blue) (Wilcoxon rank-sum test,  $P < 0.05$ ). Each bar represents the average relative abundance of a species. **C.** The principal coordinate analysis of species profile of the two groups. **D.** The Bray-Curtis distances of species profile of inter-group and intra-group sample pairs. **E.** The principal coordinate analysis of metabolic profile of the two groups. **F.** The Bray-Curtis distances of metabolic profile of inter-group and intra-group sample pairs.

**A**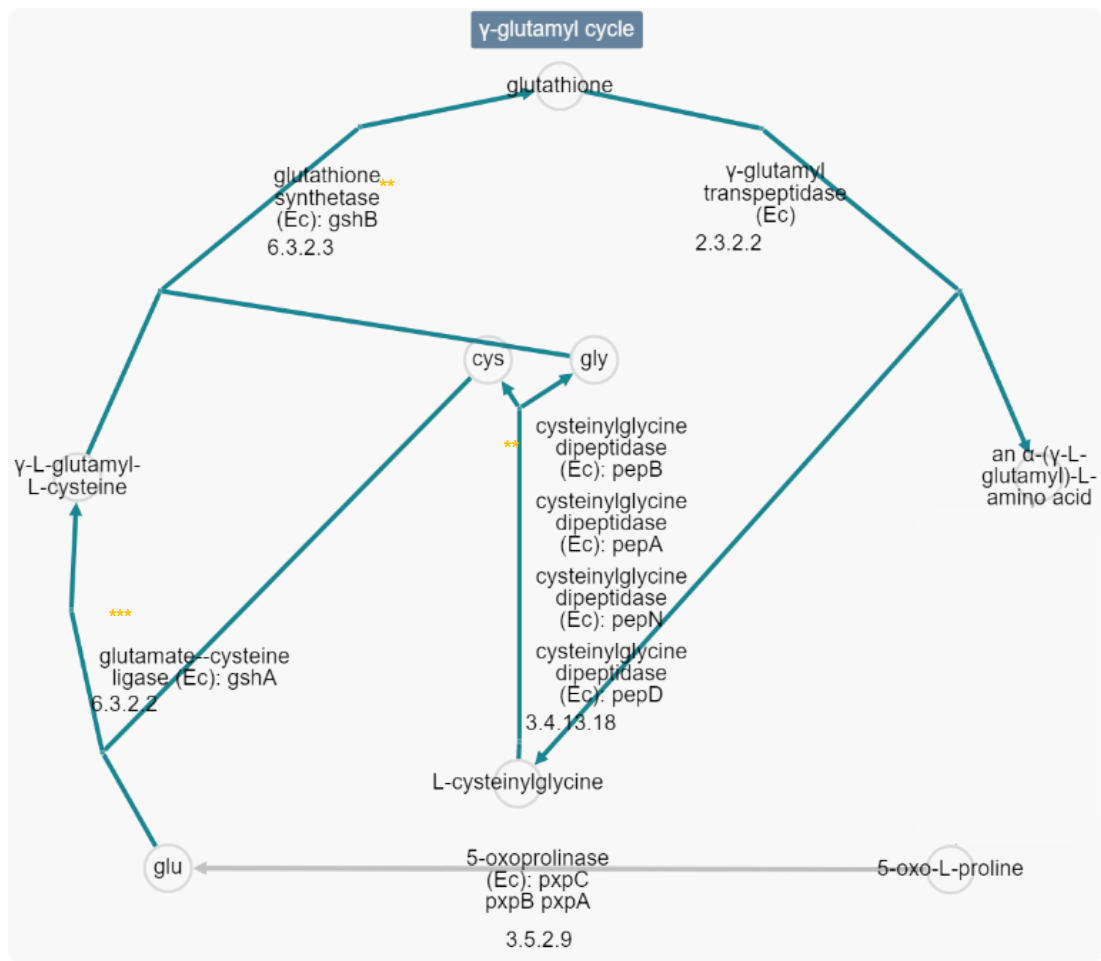**B**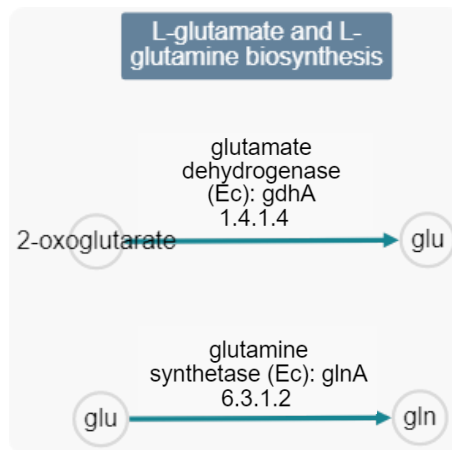

**Fig. S3. Metabolic pathway of  $\gamma$ -glutamyl cycle (A) and biosynthesis of L-glutamate and L-glutamine (B).** Green arrows, reactions with enzyme significantly deficient in ASD; gray arrows, reactions with enzyme showing no difference between ASD and HC. \* $P < 0.05$ , \*\* $P < 0.01$ , \*\*\* $P < 0.001$ .

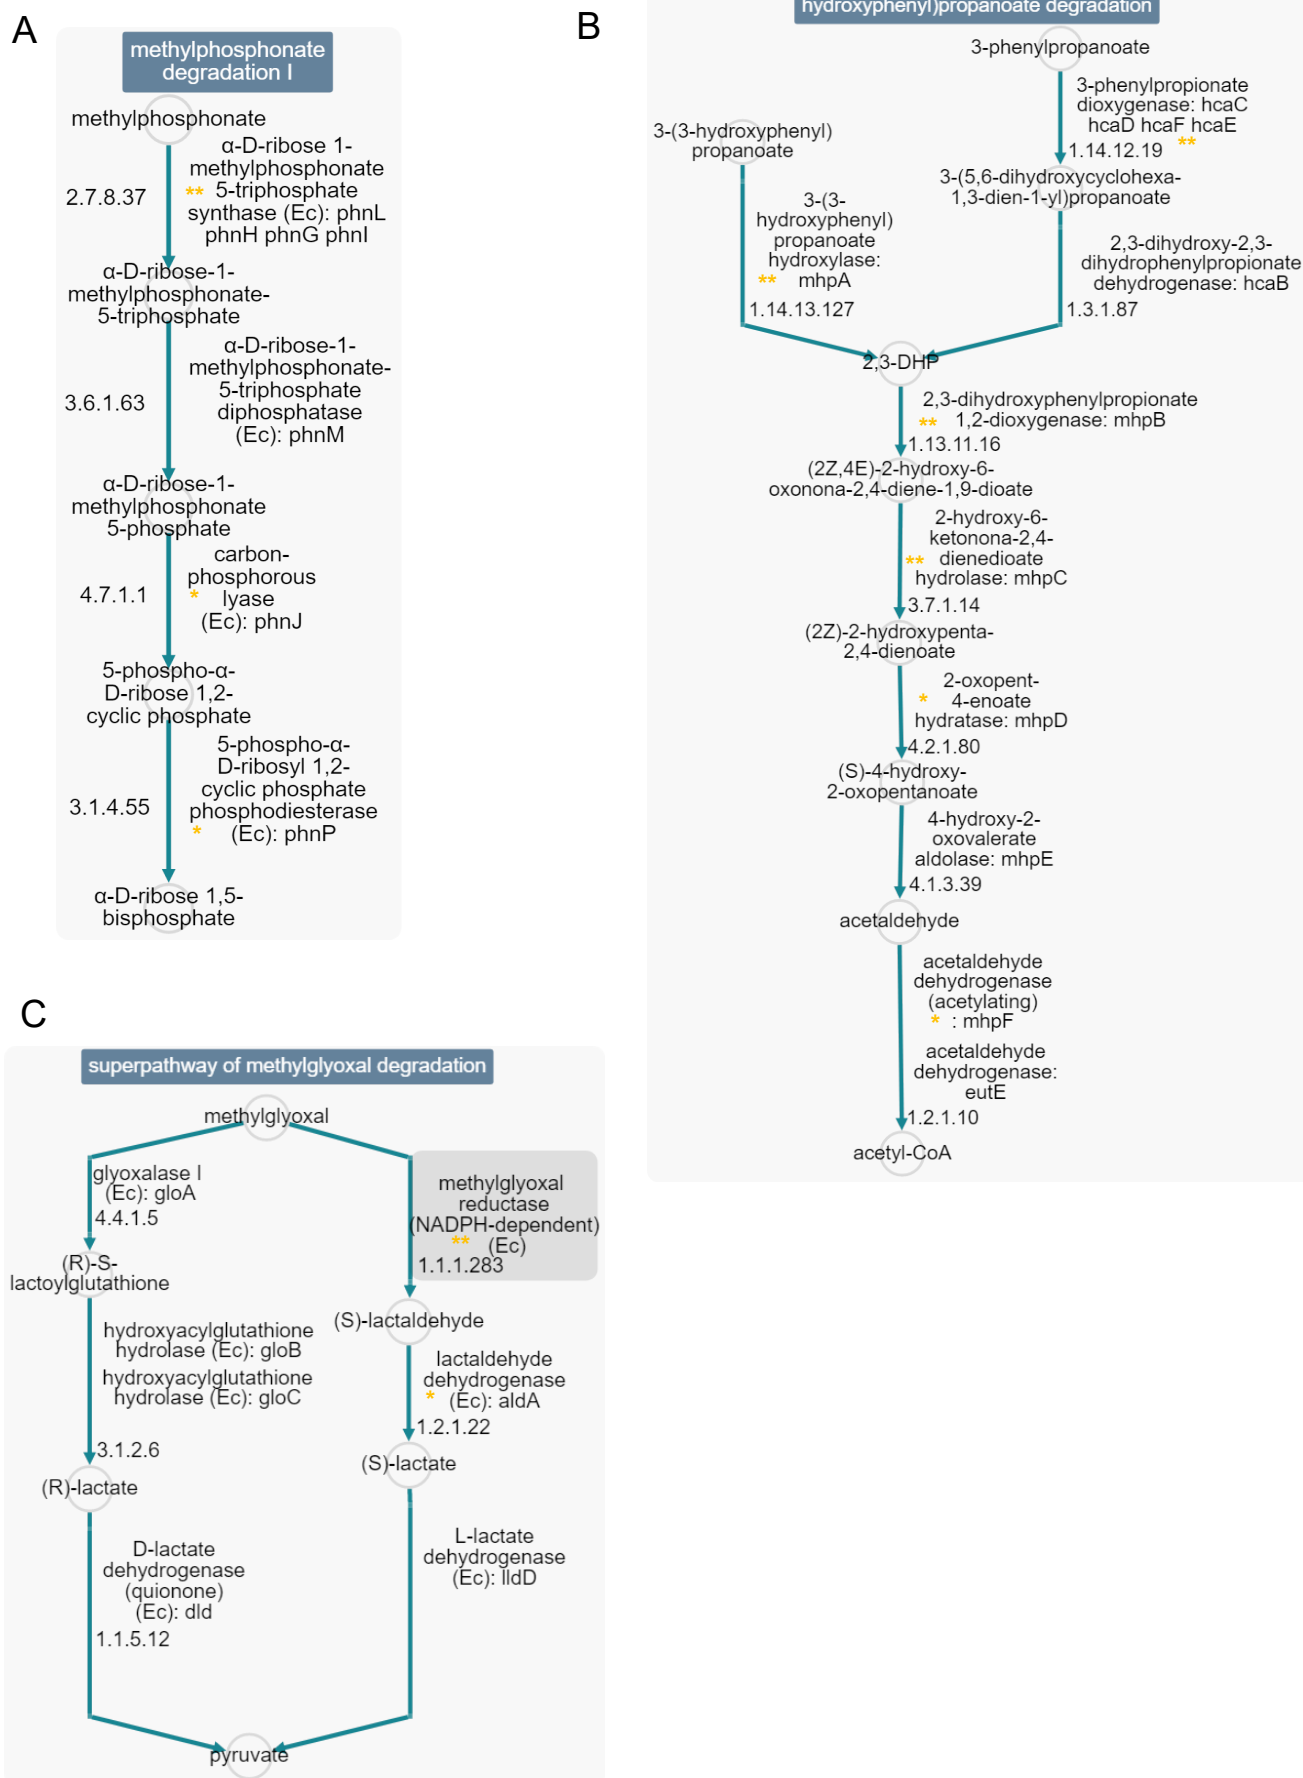

**Fig.S4. Metabolic pathway of degradation of methylphosphonate (A), 3-phenylpropanoate or 3-(3-hydroxyphenyl)-propanoate (B), and methylglyoxal (C). See Fig.S3 for other legends**

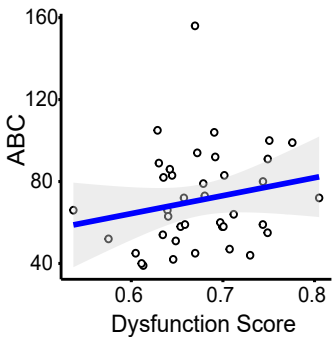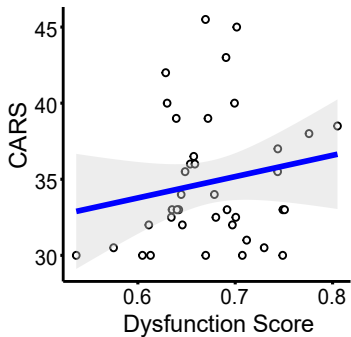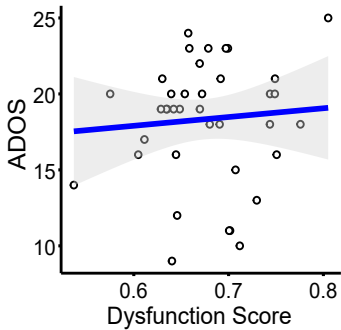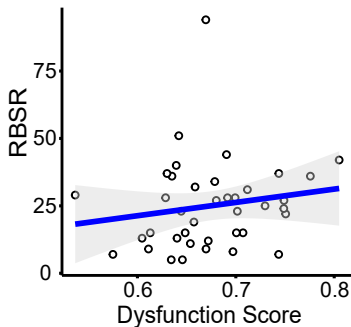

**Fig. S5. Correlation between the dysfunction score and the clinical rating scores.**

**Table S1. Demographics of participants**

|                         | ASD(n=39)   | HC(n=40)   | P value  |
|-------------------------|-------------|------------|----------|
| Age                     | 5.57±1.09   | 5.61±1.24  | 0.8895   |
| Body mass index         | 16.54±3.21  | 16.88±3.46 | 0.8682   |
| Gender(n)               |             |            | 1        |
| Female                  | 7           | 7          |          |
| Male                    | 32          | 33         |          |
| Type of delivery        |             |            | 0.0912   |
| Vaginal                 | 15          | 24         |          |
| Cesarean                | 24          | 16         |          |
| Falling asleep          |             |            | 0.0167*  |
| Difficulty              | 15          | 5          |          |
| Non-difficulty          | 24          | 35         |          |
| Awaking in the midnight |             |            | 0.0018** |
| Awoke                   | 17          | 4          |          |
| Non-awoke               | 22          | 36         |          |
| ABC                     | 70.90±23.75 | NA         | NA       |
| GSI                     | 3.97±2.54   | NA         | NA       |
| RBS-R                   | 25.03±16.56 | NA         | NA       |
| CARS                    | 34.82±4.33  | NA         | NA       |
| ADOS                    | 18.33±4.04  | NA         | NA       |



**Table S2. ASD-associated pathways identified by quasi-paired cohort**

| Enrichment | Wilcoxon signed-rank paired test P-value | fdR       | Pathways ID          | Pathways Name                                                                                 |
|------------|------------------------------------------|-----------|----------------------|-----------------------------------------------------------------------------------------------|
| HC         | 0.000028                                 | 0.0033911 | RIBOSYN2-PWY         | flavin biosynthesis I (bacteria and plants)                                                   |
| HC         | 0.0000306                                | 0.0033911 | HEMESYN2-PWY         | heme biosynthesis II (anaerobic)                                                              |
| HC         | 0.0001545                                | 0.0137193 | PWY-5189             | tetrapyrrole biosynthesis II(from glycine)                                                    |
| HC         | 0.00046264                               | 0.0319034 | TEICHOICACID-PWY     | teichoic acid poly glycerol biosynthesis                                                      |
| HC         | 0.00061637                               | 0.0319034 | PPGPPMET-PWY         | ppGpp biosynthesis                                                                            |
| HC         | 0.00064669                               | 0.0319034 | PRPP-PWY             | superpathway of histidine purine and pyrimidine biosynthesis                                  |
| HC         | 0.00076397                               | 0.0339204 | <b>PWY-4041</b>      | <b><math>\gamma</math>-glutamyl cycle</b>                                                     |
| HC         | 0.00091156                               | 0.036794  | KETOGLUCONMET-PWY    | ketogluconate metabolism                                                                      |
| HC         | 0.00152731                               | 0.0474809 | DAPLYSINESYN-PWY     | L-lysine biosynthesis I                                                                       |
| HC         | 0.001826                                 | 0.0474809 | PWY-841              | superpathway of purine nucleotides de novo biosynthesis I                                     |
| HC         | 0.00190863                               | 0.0474809 | PWY-5656             | mannosylglycerate biosynthesis I                                                              |
| HC         | 0.00262672                               | 0.0485943 | PWY-6731             | starch degradation III                                                                        |
| HC         | 0.00315144                               | 0.0559696 | <b>METHGLYUT-PWY</b> | <b>superpathway of methylglyoxal degradation</b>                                              |
| HC         | 0.00379187                               | 0.062849  | PWY0-166             | superpathway of pyrimidine deoxyribonucleotides de novo biosynthesis(E coli)                  |
| HC         | 0.00526401                               | 0.062849  | DENOVOPURINE2-PWY    | superpathway of purine nucleotides de novo biosynthesis II                                    |
| HC         | 0.00559166                               | 0.062849  | NAD-BIOSYNTHESIS-II  | NAD salvage pathway II                                                                        |
| HC         | 0.00607173                               | 0.062849  | PWY-6629             | superpathway of L-tryptophan biosynthesis                                                     |
| HC         | 0.00729989                               | 0.062849  | PWY-6471             | peptidoglycan biosynthesis IV (Enterococcus faecium)                                          |
| HC         | 0.0073771                                | 0.062849  | PWY66-409            | superpathway of purine nucleotide salvage                                                     |
| HC         | 0.00737885                               | 0.062849  | <b>HCAMHPDEG-PWY</b> | <b>3-phenylpropanoate and 3-(3-hydroxyphenyl)propanoate degradation to 2-oxopent-4-enoate</b> |
| HC         | 0.00737885                               | 0.062849  | <b>PWY-6690</b>      | <b>cinnamate and 3-hydroxycinnamate degradation to 2-oxopent-4-enoate</b>                     |
| HC         | 0.00849072                               | 0.062849  | <b>PWY0-1277</b>     | <b>3-phenylpropanoate and 3-(3-hydroxyphenyl)propanoate degradation</b>                       |
| HC         | 0.00894958                               | 0.062849  | PWY-7234             | inosine-5-phosphate biosynthesis III                                                          |
| HC         | 0.00984291                               | 0.062849  | PWY-5989             | stearate biosynthesis II (bacteria and plants)                                                |
| HC         | 0.01041628                               | 0.062849  | PWY0-162             | superpathway of pyrimidine ribonucleotides de novo biosynthesis                               |
| HC         | 0.0106139                                | 0.062849  | P161-PWY             | acetylene degradation                                                                         |
| HC         | 0.01088432                               | 0.062849  | ARGORNPAST-PWY       | L-arginine degradation (Stickland reaction)                                                   |
| HC         | 0.01097858                               | 0.062849  | PWY-5705             | allantoin degradation to glyoxylate III                                                       |

|     |            |           |                    |                                                                  |
|-----|------------|-----------|--------------------|------------------------------------------------------------------|
| HC  | 0.01122693 | 0.062849  | FOLSYN-PWY         | superpathway of tetrahydrofolate biosynthesis and salvage        |
| HC  | 0.01122693 | 0.062849  | PWY-7187           | pyrimidine deoxyribonucleotides de novo biosynthesis II          |
| HC  | 0.01143661 | 0.062849  | <b>PWY0-1533</b>   | methylphosphonate degradation I                                  |
| HC  | 0.01203191 | 0.062849  | PWY-7409           | phospholipid remodeling phosphatidylethanolamine(yeast)          |
| HC  | 0.01309857 | 0.0654768 | PWY-7209           | superpathway of pyrimidine ribonucleosides degradation           |
| HC  | 0.01312485 | 0.0654768 | PWY-7200           | superpathway of pyrimidine deoxyribonucleoside salvage           |
| HC  | 0.01411482 | 0.0695825 | PWY-6901           | superpathway of glucose and xylose degradation                   |
| HC  | 0.01426128 | 0.0695825 | GLYCOLYSIS-E-D     | superpathway of glycolysis and Entner Doudoroff                  |
| HC  | 0.01492186 | 0.0713288 | PWY-6612           | superpathway of tetrahydrofolate biosynthesis                    |
| HC  | 0.01676659 | 0.0791954 | PWY-3841           | folate transformations II                                        |
| HC  | 0.01709177 | 0.0798815 | PWY-7446           | sulfoquinovose degradation I                                     |
| HC  | 0.0175267  | 0.081061  | PWY0-1261          | anhydromuropeptides recycling I                                  |
| HC  | 0.01831873 | 0.0823467 | <b>PWY-5505</b>    | L-glutamate and L-glutamine biosynthesis                         |
| HC  | 0.01864352 | 0.0823467 | POLYISOPRENSYN-PWY | polyisoprenoid biosynthesis (E coli)                             |
| HC  | 0.01873202 | 0.0823467 | AEROBACTINSYN-PWY  | aerobactin biosynthesis                                          |
| HC  | 0.01903636 | 0.0825077 | PWY0-1338          | polymyxin resistance                                             |
| HC  | 0.01914031 | 0.0825077 | PYRIDNUCSAL-PWY    | NAD salvage pathway I                                            |
| HC  | 0.01964961 | 0.0838887 | PWY-6545           | pyrimidine deoxyribonucleotides de novo biosynthesis III         |
| HC  | 0.01999524 | 0.0845513 | PWY0-1061          | superpathway of L-alanine biosynthesis                           |
| HC  | 0.02034382 | 0.0852137 | AST-PWY            | L-arginine degradation II AST pathway                            |
| HC  | 0.02070212 | 0.0859041 | FAO-PWY            | fatty acid beta oxidation I                                      |
| HC  | 0.02142999 | 0.0881011 | PWY-6803           | phosphatidylcholine acyl editing                                 |
| HC  | 0.02180415 | 0.0888169 | PWY-7184           | pyrimidine deoxyribonucleotides de novo biosynthesis I           |
| HC  | 0.02295614 | 0.0926593 | PWY-5136           | fatty acid beta oxidation II peroxisome                          |
| HC  | 0.02355153 | 0.0933336 | PWY-5918           | superpathay of heme biosynthesis from glutamate                  |
| HC  | 0.02375382 | 0.0933336 | PWY-7197           | pyrimidine deoxyribonucleotide phosphorylation                   |
| HC  | 0.02478339 | 0.0956698 | PWY0-1297          | superpathway of purine deoxyribonucleosides degradation          |
| HC  | 0.02499442 | 0.0956698 | PWY-7560           | methylerythritol phosphate pathway II                            |
| HC  | 0.02499481 | 0.0956698 | PWY-6270           | isoprene biosynthesis I                                          |
| ASD | 0.00000327 | 0.0007267 | RHAMCAT-PWY        | L-rhamnose degradation I                                         |
| ASD | 0.00061637 | 0.0319034 | NONOXIPENT-PWY     | pentose phosphate pathway non oxidative branch                   |
| ASD | 0.00188315 | 0.0474809 | PWY-3781           | aerobic respiration I cytochrome c                               |
| ASD | 0.00208427 | 0.0474809 | PWY-6737           | starch degradation V                                             |
| ASD | 0.0022256  | 0.0474809 | GLUCUROCAT-PWY     | superpathway of beta D-glucuronide and D-glucuronate degradation |
| ASD | 0.00224572 | 0.0474809 | PWY-3801           | sucrose degradation II sucrose synthase                          |
| ASD | 0.00224572 | 0.0474809 | PWY-7345           | superpathway of anaerobic sucrose degradation                    |

|     |            |           |                       |                                                                           |
|-----|------------|-----------|-----------------------|---------------------------------------------------------------------------|
| ASD | 0.00495369 | 0.062849  | POLYAMSYN-PWY         | superpathway of polyamine biosynthesis I                                  |
| ASD | 0.00526415 | 0.062849  | P125-PWY              | superpathway of (R,R)-butanediol biosynthesis                             |
| ASD | 0.00547651 | 0.062849  | PWY-6837              | fatty acid beta oxidation V unsaturated odd number di isomerase dependent |
| ASD | 0.00617881 | 0.062849  | GALACT-GLUCUROCAT-PWY | superpathway of hexuronide and hexuronate degradation                     |
| ASD | 0.00695631 | 0.062849  | PWY-6385              | peptidoglycan biosynthesis III mycobacteria                               |
| ASD | 0.0119759  | 0.062849  | NADSYN-PWY            | NAD biosynthesis II from tryptophan                                       |
| ASD | 0.0119759  | 0.062849  | PWY-2201              | folate transformations I                                                  |
| ASD | 0.0119759  | 0.062849  | PWY-5067              | glycogen biosynthesis II (from UDP-D-Glucose)                             |
| ASD | 0.0119759  | 0.062849  | PWY-5079              | L-phenylalanine degradation III                                           |
| ASD | 0.0119759  | 0.062849  | PWY-5080              | very long chain fatty acid biosynthesis I                                 |
| ASD | 0.0119759  | 0.062849  | PWY-5304              | superpathway of sulfur oxidation (Acidianus ambivalens)                   |
| ASD | 0.0119759  | 0.062849  | <b>PWY-5306</b>       | superpathway of thiosulfate metabolism (Desulfovibrio sulfodismutans)     |
| ASD | 0.0119759  | 0.062849  | PWY-5651              | L-tryptophan degradation to 2-amino-3-carboxymuconate semialdehyde        |
| ASD | 0.0119759  | 0.062849  | PWY-6074              | zymosterol biosynthesis                                                   |
| ASD | 0.0119759  | 0.062849  | PWY-6075              | ergosterol biosynthesis I                                                 |
| ASD | 0.0119759  | 0.062849  | PWY-6981              | chitin biosynthesis                                                       |
| ASD | 0.0119759  | 0.062849  | PWY-7118              | chitin degradation to ethanol                                             |
| ASD | 0.0119759  | 0.062849  | PWY-7245              | superpathway NAD/NADP - NADH/NADPH interconversion (yeast)                |
| ASD | 0.0119759  | 0.062849  | PWY-7268              | NAD/NADP-NADH/NADPH cytosolic interconversion (yeast)                     |
| ASD | 0.0119759  | 0.062849  | PWY-7283              | wybutosine biosynthesis                                                   |
| ASD | 0.0119759  | 0.062849  | PWY-7286              | 7-(3-amino-3-carboxypropyl)-wyosine biosynthesis                          |
| ASD | 0.0119759  | 0.062849  | PWY-7288              | fatty acid beta oxidation peroxisome (yeast)                              |
| ASD | 0.0119759  | 0.062849  | PWY-7411              | superpathway of phosphatidate biosynthesis (yeast)                        |
| ASD | 0.0119759  | 0.062849  | PWY-7420              | monoacylglycerol metabolism (yeast)                                       |
| ASD | 0.0119759  | 0.062849  | PWY-7619              | juniperonate biosynthesis                                                 |
| ASD | 0.0119759  | 0.062849  | PWY0-881              | superpathway of fatty acid biosynthesis I (E coli)                        |
| ASD | 0.0119759  | 0.062849  | PWY30-355             | stearate biosynthesis III (fungi)                                         |
| ASD | 0.0119759  | 0.062849  | TRIGLSYN-PWY          | diacylglycerol and triacylglycerol biosynthesis                           |
| ASD | 0.0119759  | 0.062849  | UDPNACETYLGALSYN-PWY  | UDP-N-acetyl-D-glucosamine biosynthesis II                                |
| ASD | 0.01220453 | 0.0630094 | PWY-6531              | mannitol cycle                                                            |
| ASD | 0.01282092 | 0.0654309 | PWY-7279              | aerobic respiration II cytochrome c (yeast)                               |
| ASD | 0.01831873 | 0.0823467 | PWY-5177              | glutaryl-CoA degradation                                                  |

---

**Table S3. The metabolic categories of ASD-associated pathways**

| Function     |                                                                        | ASD-enriched                                             |                                                                                                                                                                                        | HC-enriched                                                                                                                                                |                                                                                                                                                                                                                                                                                                                                                                                             |
|--------------|------------------------------------------------------------------------|----------------------------------------------------------|----------------------------------------------------------------------------------------------------------------------------------------------------------------------------------------|------------------------------------------------------------------------------------------------------------------------------------------------------------|---------------------------------------------------------------------------------------------------------------------------------------------------------------------------------------------------------------------------------------------------------------------------------------------------------------------------------------------------------------------------------------------|
| Biosynthesis | Amino Acid Biosynthesis                                                |                                                          |                                                                                                                                                                                        | PWY0-1061<br>PWY-5505<br>DAPLYSINESYN-PWY<br>PWY-6629                                                                                                      | superpathway of L-alanine biosynthesis<br><b>L-glutamate and L-glutamine biosynthesis*</b><br>L-lysine biosynthesis I<br>superpathway of L-tryptophan biosynthesis                                                                                                                                                                                                                          |
|              | Carbohydrate Biosynthesis/Cell Structure Biosynthesis                  | PWY-6981<br>PWY-5067<br>UDPNACETYLGALSYN-PWY<br>PWY-6385 | chitin biosynthesis (yeast)<br>glycogen biosynthesis II (from UDP-D-Glucose)<br>UDP-N-acetyl-D-glucosamine biosynthesis II (yeast)<br>peptidoglycan biosynthesis III mycobacteria      | PWY-6471<br>TEICHOICACID-PWY<br>PWY0-1338                                                                                                                  | peptidoglycan biosynthesis IV Enterococcus faecium<br>teichoic acid poly glycerol biosynthesis<br>polymyxin resistance                                                                                                                                                                                                                                                                      |
|              | Cofactor, Prosthetic Group, Electron Carrier, and Vitamin Biosynthesis | PWY-7245<br>PWY-7268<br>NADSYN-PWY<br>PWY-2201           | superpathway NAD/NADP - NADH/NADPH interconversion (yeast)<br>NAD/NADP-NADH/NADPH cytosolic interconversion (yeast)<br>NAD biosynthesis II from tryptophan<br>folate transformations I | NAD-BIOSYNTHESIS-II<br>PYRIDNUCSAL-PWY<br>POLYISOPRENSYN-PWY<br>HEMESYN2-PWY<br>PWY-5918<br>PWY-4041<br>FOLSYN-PWY<br>PWY-6612<br>PWY-3841<br>RIBOSYN2-PWY | NAD salvage pathway II<br>NAD salvage pathway I<br>polyisoprenoid biosynthesis E coli<br>heme biosynthesis II anaerobic superpathway of heme biosynthesis from glutamate<br><b>γ-glutamyl cycle</b><br>superpathway of tetrahydrofolate biosynthesis and salvage<br>superpathway of tetrahydrofolate biosynthesis<br>folate transformations II<br>flavin biosynthesis I bacteria and plants |

|                                                    |                                          |                                                               |                   |                                                                             |
|----------------------------------------------------|------------------------------------------|---------------------------------------------------------------|-------------------|-----------------------------------------------------------------------------|
|                                                    |                                          |                                                               | PWY-5189          | tetrapyrrole biosynthesis II from glycine                                   |
| <b>Fatty Acid and Lipid Biosynthesis</b>           | <b>PWY-7420</b>                          | <b>monoacylglycerol metabolism (yeast)</b>                    | PWY-6803          | phosphatidylcholine acyl editing                                            |
|                                                    | <b>TRIGLSYN-PWY</b>                      | <b>diacylglycerol and triacylglycerol biosynthesis(yeast)</b> | PWY-5989          | stearate biosynthesis II bacteria and plants                                |
|                                                    | PWY-5080                                 | very long chain fatty acid biosynthesis I                     | <b>PWY-7409</b>   | <b>phospholipid remodeling phosphatidylethanolamine (yeast)</b>             |
|                                                    | PWY0-881                                 | superpathway of fatty acid biosynthesis I E coli              |                   |                                                                             |
|                                                    | <b>PWY30-355</b>                         | <b>stearate biosynthesis III fungi/yeast</b>                  |                   |                                                                             |
|                                                    | <b>PWY-7619</b>                          | <b>juniperonate biosynthesis (yeast)</b>                      |                   |                                                                             |
|                                                    | <b>PWY-7411</b>                          | <b>superpathway of phosphatidate biosynthesis (yeast)</b>     |                   |                                                                             |
|                                                    | <b>PWY-6074</b>                          | <b>zymosterol biosynthesis (yeast)</b>                        |                   |                                                                             |
| <b>PWY-6075</b>                                    | <b>ergosterol biosynthesis I (yeast)</b> |                                                               |                   |                                                                             |
| <b>Purine / Pyrimidine Nucleotide Biosynthesis</b> |                                          |                                                               | PWY-7234          | inosine-5-phosphate biosynthesis III                                        |
|                                                    |                                          |                                                               | PWY-841           | superpathway of purine nucleotides de novo biosynthesis I                   |
|                                                    |                                          |                                                               | DENOVOPURINE2-PWY | superpathway of purine nucleotides de novo biosynthesis II                  |
|                                                    |                                          |                                                               | PWY66-409         | superpathway of purine nucleotide salvage                                   |
|                                                    |                                          |                                                               | PWY0-166          | superpathway of pyrimidine deoxyribonucleotides de novo biosynthesis E.coli |
|                                                    |                                          |                                                               | PWY-7187          | pyrimidine deoxyribonucleotides de novo biosynthesis II                     |
|                                                    |                                          |                                                               | PWY-6545          | pyrimidine deoxyribonucleotides de novo biosynthesis III                    |
|                                                    |                                          |                                                               | PWY-7184          | pyrimidine deoxyribonucleotides de novo biosynthesis I                      |
|                                                    |                                          |                                                               | PWY0-162          | superpathway of pyrimidine ribonucleotides de novo biosynthesis             |
|                                                    |                                          |                                                               | PWY-7200          | superpathway of pyrimidine deoxyribonucleoside salvage                      |

|                                              |                                             |                             |                                                                                                                             |                                                                                                                |                                                                                                                                                                                                                                             |
|----------------------------------------------|---------------------------------------------|-----------------------------|-----------------------------------------------------------------------------------------------------------------------------|----------------------------------------------------------------------------------------------------------------|---------------------------------------------------------------------------------------------------------------------------------------------------------------------------------------------------------------------------------------------|
|                                              |                                             |                             | PWY-7197<br>PRPP-PWY                                                                                                        | pyrimidine deoxyribonucleotide phosphorylation<br>superpathway of histidine purine and pyrimidine biosynthesis |                                                                                                                                                                                                                                             |
|                                              | <b>Secondary Metabolite Biosynthesis</b>    |                             | AEROBACTINSYN-PWY<br>PWY-6270<br>PWY-7560                                                                                   | aerobactin biosynthesis<br>isoprene biosynthesis I<br>methylerythritol phosphate pathway II                    |                                                                                                                                                                                                                                             |
|                                              | <b>Metabolic Regulator Biosynthesis</b>     |                             | PPGPPMET-PWY<br>PWY-5656                                                                                                    | ppGpp biosynthesis<br>mannosylglycerate biosynthesis I                                                         |                                                                                                                                                                                                                                             |
|                                              | <b>Amine and Polyamine Biosynthesis</b>     | POLYAMSYN-PWY               | superpathway of polyamine biosynthesis I                                                                                    |                                                                                                                |                                                                                                                                                                                                                                             |
| <b>Degradation/Utilization /Assimilation</b> | <b>Carbohydrate/Carboxylate Degradation</b> | PWY-6737                    | starch degradation V                                                                                                        | PWY-6731                                                                                                       | starch degradation III                                                                                                                                                                                                                      |
|                                              |                                             | RHAMCAT-PWY                 | L-rhamnose degradation I                                                                                                    | PWY-6901                                                                                                       | superpathway of glucose and xylose degradation                                                                                                                                                                                              |
|                                              |                                             | PWY-3801                    | sucrose degradation II sucrose synthase                                                                                     | P161-PWY                                                                                                       | acetylene degradation                                                                                                                                                                                                                       |
|                                              |                                             | PWY-7345                    | superpathway of anaerobic sucrose degradation                                                                               | KETOGLUCONMET-PWY                                                                                              | ketogluconate metabolism                                                                                                                                                                                                                    |
|                                              |                                             | PWY-5177                    | glutaryl-CoA degradation                                                                                                    |                                                                                                                |                                                                                                                                                                                                                                             |
|                                              | <b>Amino Acid Degradation</b>               | <b>PWY-5079</b><br>PWY-5651 | <b>L-phenylalanine degradation III (yeast)</b><br><b>L-tryptophan degradation to 2-amino-3-carboxymuconate semialdehyde</b> | ARGORNPROST-PWY<br>AST-PWY                                                                                     | L-arginine degradation (Stickland reaction)<br>L arginine degradation II AST pathway                                                                                                                                                        |
|                                              | <b>Aromatic Compound Degradation</b>        |                             |                                                                                                                             | <b>PWY0-1277</b><br><b>HCAMHPDEG-PWY</b><br><b>PWY-6690</b>                                                    | <b>3-phenylpropanoate and 3-(3-hydroxyphenyl)propanoate degradation</b><br><b>3-phenylpropanoate and 3-(3-hydroxyphenyl)propanoate degradation to 2-oxopent-4-enoate cinnamate and 3-hydroxycinnamate degradation to 2-oxopent-4-enoate</b> |
|                                              | <b>Fatty Acid and Lipid Degradation</b>     | <b>PWY-6837</b>             | <b>fatty acid beta-oxidation V (yeast)</b>                                                                                  | FAO-PWY                                                                                                        | fatty acid beta oxidation I                                                                                                                                                                                                                 |

|                                                      |                                              |                                                                |                                                                                                                                                                                                                               |                       |                                                                                                                   |
|------------------------------------------------------|----------------------------------------------|----------------------------------------------------------------|-------------------------------------------------------------------------------------------------------------------------------------------------------------------------------------------------------------------------------|-----------------------|-------------------------------------------------------------------------------------------------------------------|
|                                                      |                                              | PWY-7288                                                       | fatty acid $\beta$ -oxidation (peroxisome, yeast)                                                                                                                                                                             | PWY-5136              | fatty acid beta oxidation II peroxisome                                                                           |
|                                                      | <b>Inorganic Nutrient Metabolism</b>         | PWY-5306<br>PWY-5304                                           | superpathway of thiosulfate metabolism Desulfovibrio sulfodismutans<br>superpathway of sulfur oxidation Acidianus ambivalens                                                                                                  | PWY0-1533             | <b>methylphosphonate degradation I</b>                                                                            |
|                                                      | <b>Nucleoside and Nucleotide Degradation</b> |                                                                |                                                                                                                                                                                                                               | PWY0-1297<br>PWY-7209 | superpathway of purine deoxyribonucleosides degradation<br>superpathway of pyrimidine ribonucleosides degradation |
|                                                      | <b>Secondary Metabolite Degradation</b>      | PWY-6531                                                       | mannitol cycle                                                                                                                                                                                                                | PWY0-1261<br>PWY-7446 | anhydromuropeptides recycling I<br>sulfoquinovose degradation I                                                   |
|                                                      | <b>Aldehyde Degradation</b>                  |                                                                |                                                                                                                                                                                                                               | METHGLYUT-PWY         | <b>superpathway of methylglyoxal degradation</b>                                                                  |
|                                                      | <b>Allantoin Degradation</b>                 |                                                                |                                                                                                                                                                                                                               | PWY-5705              | allantoin degradation to glyoxylate III                                                                           |
| <b>Generation of Precursor Metabolite and Energy</b> |                                              | PWY-7118<br>PWY-7279<br>P125-PWY<br>NONOXIPENT-PWY<br>PWY-3781 | chitin degradation to ethanol (yeast)<br>aerobic respiration II cytochrome c (yeast)<br>superpathway of (R,R)-butanediol biosynthesis<br>pentose phosphate pathway non oxidative branch<br>aerobic respiration I cytochrome c | GLYCOLYSIS-E-D        | superpathway of glycolysis and the Entner-Doudoroff pathway                                                       |
| <b>Macromolecule Modification</b>                    | <b>Nucleic Acid Processing</b>               | PWY-7283<br>PWY-7286                                           | wybutosine biosynthesis (yeast)<br>7-(3-amino-3-carboxypropyl)-wyosine biosynthesis                                                                                                                                           |                       |                                                                                                                   |

**Table S4. ASD-deficient enzymes involved in toxicant degradation.**

| EC number  | Enzyme                                            | Gene                                      | pathway                                                                  | substrate                                                          | meanASD  | meanHC   | Wilcoxon signed-rank paired test P-value | fdr      |
|------------|---------------------------------------------------|-------------------------------------------|--------------------------------------------------------------------------|--------------------------------------------------------------------|----------|----------|------------------------------------------|----------|
| 3.6.1.7    | acylphosphatase;<br>acetylphosphatase             | yccX                                      | Aminobenzoate degradation                                                | Benzoyl phosphate                                                  | 2.29E-05 | 3.91E-05 | 2.72E-05                                 | 0.003035 |
| 4.1.1.61   | 4-hydroxybenzoate<br>decarboxylase                | ECO26_3806/ECO26_3807                     | Aminobenzoate degradation                                                | phenol                                                             | 4.86E-07 | 2.43E-06 | 0.033416                                 | 0.10691  |
| 3.5.1.4    | amidase; acylamidase;<br>acylase                  | gatA                                      | Aminobenzoate degradation;<br>Styrene degradation                        | Benzamide ;<br>Phenylacetamide; Acrylamide                         | 1.04E-07 | 1.77E-07 | 0.000188                                 | 0.010585 |
| 2.8.3.6    | 3-oxoadipate CoA-<br>transferase                  | pcaI( <i>Escherichia fergusonii</i> )     | Benzoate degradation                                                     | 3-oxoadipate                                                       | 1.76E-08 | 5.02E-08 | 0.002705                                 | 0.043417 |
| 1.14.12.10 | benzoate 1,2-dioxygenase;<br>benzoate hydroxylase | benA( <i>Escherichia fergusonii</i> )     | Benzoate degradation                                                     | benzoate                                                           | 2.26E-08 | 3.34E-08 | 0.002768                                 | 0.043727 |
| 1.1.1.1    | alcohol dehydrogenase;<br>aldehyde reductase      | adhP/yiaY                                 | Chloroalkane and<br>chloroalkene degradation;<br>Naphthalene degradation | Chloro-2-propene-1-<br>ol;Chloroallyl alcohol;2-<br>Naphthaldehyde | 3.84E-05 | 4.90E-05 | 0.020169                                 | 0.075624 |
| 1.2.1.39   | phenylacetaldehyde<br>dehydrogenase               | feaB                                      | Styrene degradation                                                      | Phenylacetaldehyde                                                 | 3.24E-07 | 9.55E-07 | 0.043549                                 | 0.12847  |
| 1.1.1.90   | aryl-alcohol<br>dehydrogenase                     | KPN_01945( <i>Klebsiella pneumoniae</i> ) | Xylene degradation                                                       | Methylbenzyl alcohol                                               | 4.43E-08 | 1.03E-07 | 0.0023                                   | 0.04055  |



**Table S5. Measurements of urine organic acids in ASD children**

| Urinal organic acid           | meanASD  | meanHC   | enrich group | wilcoxon text<br>p-value | fdr      |
|-------------------------------|----------|----------|--------------|--------------------------|----------|
| N-Acetylcysteine              | 0.144231 | 0.087667 | ASD          | 5.77E-05                 | 0.004328 |
| 2-Hydroxyphenylacetic acid    | 1.407692 | 0.701667 | ASD          | 0.000491                 | 0.010956 |
| Suberic acid                  | 4.847692 | 2.643333 | ASD          | 0.00067                  | 0.010956 |
| 2-Oxo-4-methiolbutyric acid   | 0.135769 | 0.105444 | ASD          | 0.002119                 | 0.020093 |
| Mandelic acid                 | 0.118077 | 0.076111 | ASD          | 0.002143                 | 0.020093 |
| Sebacic acid                  | 0.189615 | 0.127611 | ASD          | 0.002949                 | 0.022116 |
| Phosphoric acid               | 4621.577 | 2635.056 | ASD          | 0.003302                 | 0.022514 |
| Thymine                       | 0.428846 | 0.294056 | ASD          | 0.005202                 | 0.028812 |
| 2-Oxoisovaleric acid          | 1.031154 | 0.736111 | ASD          | 0.005378                 | 0.028812 |
| Fumaric acid                  | 1.551538 | 0.901111 | ASD          | 0.006265                 | 0.031327 |
| Glutaric acid                 | 1.668077 | 0.928889 | ASD          | 0.01177                  | 0.049043 |
| 2-Hydroxyhippuric acid        | 0.967308 | 0.524056 | ASD          | 0.013466                 | 0.051474 |
| 2-Hydroxyisovaleric acid      | 0.299231 | 0.274611 | ASD          | 0.013788                 | 0.051474 |
| Methylsuccinic acid           | 3.716154 | 2.512778 | ASD          | 0.014413                 | 0.051474 |
| 2-Oxoisocaproic acid          | 0.217692 | 0.174778 | ASD          | 0.019554                 | 0.063764 |
| Aconitic acid                 | 26.96462 | 18.26    | ASD          | 0.025612                 | 0.080037 |
| 5-HIAA                        | 4.614615 | 4.020556 | ASD          | 0.035656                 | 0.102873 |
| Glycolic acid                 | 45.42308 | 23.10056 | ASD          | 0.035663                 | 0.102873 |
| 4-Hydroxyhippuric acid        | 20.79346 | 14.57833 | ASD          | 0.037806                 | 0.105016 |
| Carboxycitric acid            | 12.28038 | 8.685556 | ASD          | 0.041165                 | 0.106683 |
| Pantothenic acid              | 3.822692 | 2.832222 | ASD          | 0.041251                 | 0.106683 |
| N-Acetylaspartic acid         | 2.550385 | 1.866111 | ASD          | 0.046218                 | 0.115545 |
| $\alpha$ -Oxoglutaric acid    | 27.275   | 19.775   | ASD          | 0.057673                 | 0.135172 |
| 3-Methylglutaric acid         | 0.946154 | 0.634278 | ASD          | 0.060935                 | 0.137474 |
| Phenyllactic acid             | 0.167692 | 0.106278 | ASD          | 0.062321                 | 0.137474 |
| 4-Cresol                      | 19.81692 | 14.02278 | ASD          | 0.077295                 | 0.165631 |
| Pyridoxic acid                | 20.99423 | 18.98667 | ASD          | 0.132554                 | 0.26162  |
| Ascorbic acid                 | 53.55769 | 48.59556 | ASD          | 0.145322                 | 0.272479 |
| 5-Hydroxymethyl-2-furoic acid | 12.65808 | 9.470556 | ASD          | 0.155376                 | 0.277588 |
| Pyroglutamic acid             | 46.65269 | 33.27778 | ASD          | 0.155449                 | 0.277588 |
| 2-Hydroxybutyric acid         | 0.902308 | 0.619056 | ASD          | 0.166119                 | 0.28326  |
| Oxalic acid                   | 51.71923 | 46.71056 | ASD          | 0.166179                 | 0.28326  |
| Tricarballic acid             | 1.042692 | 0.878333 | ASD          | 0.185125                 | 0.308492 |
| Vanillylmandelic(VMA)         | 6.727308 | 5.431111 | ASD          | 0.189209                 | 0.308492 |
| Benzoic acid                  | 3.097692 | 2.923333 | ASD          | 0.197301                 | 0.314842 |
| Succinic acid                 | 17.05077 | 14.18556 | ASD          | 0.2101                   | 0.321582 |
| 2-Hydroxyisocaproic acid      | 0.245769 | 0.203111 | ASD          | 0.236442                 | 0.354662 |
| Creatinine                    | 0.748462 | 0.632222 | ASD          | 0.242074                 | 0.355991 |
| Adipic acid                   | 5.861923 | 4.764444 | ASD          | 0.251851                 | 0.356654 |
| HMG                           | 21.49962 | 19.58833 | ASD          | 0.256791                 | 0.356654 |
| Malic acid                    | 2.423846 | 2.121667 | ASD          | 0.310295                 | 0.408283 |
| Homegentisic acid             | 0.203846 | 0.195389 | ASD          | 0.396054                 | 0.495068 |
| Quinolinic acid               | 3.278462 | 3.157778 | ASD          | 0.410172                 | 0.50431  |
| DHPPA                         | 0.508846 | 0.35     | ASD          | 0.56654                  | 0.663914 |

|                             |          |          |     |          |          |
|-----------------------------|----------|----------|-----|----------|----------|
| 3-Indoleacetic acid         | 5.910769 | 4.093333 | ASD | 0.582977 | 0.671441 |
| Citric acid                 | 82.25    | 76.91111 | ASD | 0.693672 | 0.753991 |
| Homovanillic(HVA)           | 7.889231 | 6.857222 | ASD | 0.792871 | 0.837539 |
| Methylmalonic acid          | 2.699231 | 2.633333 | ASD | 0.95241  | 0.961907 |
| Glyceric acid               | 1.894231 | 3.933889 | HC  | 0.000196 | 0.007352 |
| Citramalic acid             | 1.073846 | 2.467778 | HC  | 0.00073  | 0.010956 |
| Ethylmalonic acid           | 2.012308 | 5.789444 | HC  | 0.001168 | 0.014598 |
| 4-Hydroxyphenylacetic acid  | 11.12538 | 24.58389 | HC  | 0.002432 | 0.020268 |
| 4-Hydroxyphenyllactic acid  | 0.396154 | 0.909444 | HC  | 0.004321 | 0.027006 |
| 3-Oxoglutaric acid          | 0.192308 | 0.375556 | HC  | 0.007166 | 0.03359  |
| Phenylpyruvic acid          | 1.512692 | 3.374389 | HC  | 0.008946 | 0.039469 |
| Furan-2,5-dicarboxylic acid | 6.332308 | 9.353333 | HC  | 0.01754  | 0.059794 |
| Lactic acid                 | 8.77     | 16.03833 | HC  | 0.057167 | 0.135172 |
| HVA/VMA-ratio               | 1.166538 | 1.431111 | HC  | 0.083401 | 0.173753 |
| Malonic acid                | 4.606154 | 6.502222 | HC  | 0.104511 | 0.211847 |
| Hippuric acid               | 130.5154 | 195.5111 | HC  | 0.138867 | 0.267052 |
| 3-Methyl-2-oxovaleric acid  | 0.45     | 0.451111 | HC  | 0.205311 | 0.320798 |
| Pyruvic acid                | 1.825385 | 2.526667 | HC  | 0.256774 | 0.356654 |
| 4-Hydroxybenzoic acid       | 0.918077 | 1.148722 | HC  | 0.288043 | 0.392786 |
| Orotic acid                 | 0.446154 | 0.689556 | HC  | 0.293341 | 0.392868 |
| Uracil                      | 3.942692 | 6.512778 | HC  | 0.339652 | 0.439205 |
| Hydroxybutyric acid         | 2.235769 | 2.661111 | HC  | 0.37709  | 0.479352 |
| HPHPA                       | 43.22269 | 46.70722 | HC  | 0.515478 | 0.623563 |
| Quinolinic acid/5-HIAA      | 0.753462 | 0.820556 | HC  | 0.526943 | 0.627313 |
| Arabinose                   | 19.47077 | 23.235   | HC  | 0.590868 | 0.671441 |
| Kynurenic acid              | 1.174615 | 1.599444 | HC  | 0.658708 | 0.735888 |
| Tartaric acid               | 2.641538 | 2.944444 | HC  | 0.667205 | 0.735888 |
| 4-Hydroxybutyric acid       | 1.473846 | 1.743889 | HC  | 0.711359 | 0.76217  |
| Acetoacetic acid            | 3.640769 | 3.896111 | HC  | 0.820553 | 0.854743 |
| Furancarboxylglycine        | 1.262692 | 1.73     | HC  | 0.914422 | 0.939475 |
| Methylcitric acid           | 1.785769 | 2.386111 | HC  | 0.961907 | 0.961907 |
